# Supplementary material for: Bilateral asymmetry of skin temperature is not related to bilateral asymmetry of crank torque during an incremental cycling exercise to exhaustion
Source: PeerJ. 2018 Mar 1;6:e4438. doi: 10.7717/peerj.4438 (PMC5835345; doi:10.7717/peerj.4438)
Supplement: Data S1 [file peerj-06-4438-s001.xlsx]

## Sheet: Thermal raw data
	S2					S6					S9					S1					S7					S3					S4					S5					S10					S8
		Tmax R	Tmax L	Average			Tmax R	Tmax L	Average			Tmax R	Tmax L	Average			Tmax R	Tmax L	Average			Tmax R	Tmax L	Average			Tmax R	Tmax L	Average			Tmax R	Tmax L	Average			Tmax R	Tmax L	Average			Tmax R	Tmax L	Average			Tmax R	Tmax L	Average
	Basal	33.06	33.76	33.41		Basal	33.14	33.4	33.27		Basal	33.14	33.06	33.1		Basal	33.08	32.62	32.85		Basal	32.062	32.106	32.084		Basal	32.4	32.6	32.5		Basal	32.04	32.006	32.023		Basal	31.124	30.866	30.995		Basal	33.79	33.454	33.622		Basal	31.6	32.3	31.95
	Basal	32.94	33.8	33.37		Basal	33.14	33.34	33.24		Basal	33.22	33	33.11		Basal	33.12	32.64	32.88		Basal	32.074	32.064	32.069		Basal	32.15	31.976	32.063		Basal	32.15	31.976	32.063		Basal	31.05	30.772	30.911		Basal	33.746	33.48	33.613		Basal	31.658	32.338	31.998
	Basal	32.96	33.68	33.32		Basal	33.06	33.26	33.16		Basal	33.16	32.98	33.07		Basal	32.98	32.46	32.72		Basal	32.158	32.094	32.126		Basal	32.4	32.2	32.3		Basal	32.052	31.842	31.947		Basal	31.124	30.872	30.998		Basal	33.66	33.346	33.503		Basal	31.662	32.264	31.963
	end warm up	32.5	32.96	32.73		end warm up	32.1	32.36	32.23		end warm up	33.3	33.42	33.36		end warm up	33.74	32.84	33.29		end warm up	33.442	33.516	33.479		end warm up	32.9	33.366	33.133		end warm up	32.958	33.366	33.162		end warm up	31.266	31.394	31.33		end warm up	32.954	32.584	32.769		end warm up	31.518	32.048	31.783
	end warm up	32.4	32.94	32.67		end warm up	32.2	32.4	32.3		end warm up	33.32	33.42	33.37		end warm up	33.78	32.88	33.33		end warm up	33.572	33.468	33.52		end warm up	32.98	33.5	33.24		end warm up	32.98	33.442	33.211		end warm up	31.368	31.382	31.375		end warm up	33.052	32.59	32.821		end warm up	31.48	32.02	31.75
	exhaustion	31.38	31.08	31.23		exhaustion	31.34	31.64	31.49		exhaustion	33.14	32.5	32.82		exhaustion	31.34	31.34	31.34		exhaustion	33.214	33.474	33.344		exhaustion	30.5	31	30.75		exhaustion	30.662	31.06	30.861		exhaustion	29.518	29.022	29.27		exhaustion	29.892	31.052	30.472		exhaustion	30.656	31.752	31.204
	exhaustion	31.64	31.38	31.51		exhaustion	31.56	31.72	31.64		exhaustion	33.12	32.48	32.8		exhaustion	31.22	31.2	31.21		exhaustion	33.34	33.392	33.366		exhaustion	30.754	31.098	30.926		exhaustion	30.754	31.098	30.926		exhaustion	29.724	28.696	29.21		exhaustion	30.026	31.18	30.603		exhaustion	30.932	31.558	31.245
	recovery	32.84	33.02	32.93		recovery	32.24	32.42	32.33		recovery	34.12	33.9	34.01		recovery	32.62	32.5	32.56		recovery	33.124	33.166	33.145		recovery	31.7	32.6	32.15		recovery	31.866	32.782	32.324		recovery	31.92	31.948	31.934		recovery	31.464	31.908	31.686		recovery	32.682	33.182	32.932
	recovery	33.18	33.16	33.17		recovery	32.68	32.48	32.58		recovery	34.4	33.82	34.11		recovery	32.84	32.62	32.73		recovery	33.326	33.238	33.282		recovery	32	32.8	32.4		recovery	32.208	33.002	32.605		recovery	32.158	32.27	32.214		recovery	31.672	32.01	31.841		recovery	32.952	33.326	33.139
	recovery	32.9	33.18	33.04		recovery	32.5	32.48	32.49		recovery	33.94	33.62	33.78		recovery	32.82	32.8	32.81		recovery	32.614	32.904	32.759		recovery	32.1	32.7	32.4		recovery	32.032	32.836	32.434		recovery	32.438	32.268	32.353		recovery	31.66	31.97	31.815		recovery	32.35	32.796	32.573
	recovery	33.14	33.36	33.25		recovery	32.7	32.56	32.63		recovery	33.98	33.58	33.78		recovery	33.1	32.96	33.03		recovery	32.89	32.864	32.877		recovery	32.234	32.776	32.505		recovery	32.234	32.776	32.505		recovery	32.596	32.668	32.632		recovery	31.738	32.088	31.913		recovery	32.43	32.942	32.686
		31.8067	31.8				31.7	31.92				33.1933	32.8				32.1133	31.8067				33.3753	33.4447				31.4113	31.866				31.4653	31.8667				30.2033	29.7				30.99	31.6073				31.0227	31.7767
	S1		S2		S3		S4		S5		S6		S7		S8		S9		S10
Lowe limbs -->	R	L	R	L	R	L	R	L	R	L	R	L	R	L	R	L	R	L	R	L
BASAL	33.06	32.5733	32.9867	33.7467	32.3167	32.2587	32.0807	31.9413	31.0993	30.8367	33.1133	33.3333	32.098	32.088	31.64	32.3007	33.1733	33.0133	33.732	33.4267
START	33.76	32.86	32.45	32.95	32.94	33.433	32.969	33.404	31.317	31.388	32.15	32.38	33.507	33.492	31.499	32.034	33.31	33.42	33.003	32.587
END	31.28	31.27	31.51	31.23	30.627	31.049	30.708	31.079	29.621	28.859	31.45	31.68	33.277	33.433	30.794	31.655	33.13	32.49	29.959	31.116
REC 1	32.73	32.56	33.01	33.09	31.85	32.7	32.037	32.892	32.039	32.109	32.46	32.45	33.225	33.202	32.817	33.254	34.26	33.86	31.568	31.959
REC 2	32.96	32.88	33.02	33.27	32.167	32.738	32.133	32.806	32.517	32.468	32.6	32.52	32.752	32.884	32.39	32.869	33.96	33.6	31.699	32.029

## Sheet: Kinetic raw data
Subjects	Angle (degrees modulo 360)		0	2	4	6	8	10	12	14	16	18	20	22	24	26	28	30	32	34	36	38	40	42	44	46	48	50	52	54	56	58	60	62	64	66	68	70	72	74	76	78	80	82	84	86	88	90	92
S1	100	[Torque left (Nm)]	4.48233	3.76667	2.70633	1.97533	1.29133	0.438333	-0.135	-0.733667	-1.37733	-1.875	-2.35233	-2.967	-3.52967	-4.09367	-4.92	-5.629	-6.39633	-7.38967	-8.20433	-9.06033	-10.0353	-10.8473	-11.6623	-12.5113	-13.1957	-13.8623	-14.537	-15.1483	-15.705	-16.1523	-16.642	-16.94	-17.159	-17.3777	-17.352	-17.109	-16.6477	-15.8447	-14.4647	-13.1543	-12.0443	-11.356	-11.422	-11.599	-11.9923	-12.3667	-12.8297
S2		[Torque left (Nm)]	2.98067	2.06133	0.798	-0.0463333	-0.925	-1.988	-2.72633	-3.49867	-4.37867	-5.08967	-5.777	-6.621	-7.28933	-7.95367	-8.758	-9.40733	-10.005	-10.779	-11.3917	-12.0067	-12.726	-13.3087	-13.9423	-14.5947	-15.099	-15.614	-16.0367	-16.4187	-16.7513	-17.01	-17.365	-17.6657	-17.819	-17.999	-18.0043	-17.7713	-17.471	-16.8877	-15.9393	-15.3727	-14.9767	-14.8013	-15.0843	-15.2033	-15.5837	-16.0093	-16.339
S3		[Torque left (Nm)]	6.58467	5.84667	5.24067	4.28	3.64533	3.016	2.17967	1.67567	1.04733	0.315333	-0.186333	-0.767667	-1.36567	-1.90633	-2.47733	-3.07667	-3.67467	-4.24067	-4.90767	-5.56033	-6.10067	-6.873	-7.526	-8.116	-8.92267	-9.479	-10.0497	-10.7413	-11.188	-11.7273	-12.2757	-12.558	-12.9793	-13.2793	-13.427	-13.727	-13.78	-13.915	-14.167	-14.337	-14.7057	-15.0647	-15.3137	-15.6327	-15.6453	-15.6747	-15.7053
S4		[Torque left (Nm)]	3.94033	3.25433	2.21667	1.54733	0.881333	0.0116667	-0.544	-1.20233	-1.90133	-2.475	-3.038	-3.63333	-4.20667	-4.71267	-5.29067	-5.83033	-6.25367	-6.87867	-7.39167	-7.85467	-8.512	-9.02767	-9.49067	-10.1303	-10.575	-11.0477	-11.6113	-11.9483	-12.3303	-12.7377	-12.9447	-13.2943	-13.5577	-13.771	-14.126	-14.2857	-14.434	-14.578	-14.469	-14.489	-14.3517	-14.1417	-14.0833	-13.8017	-13.601	-13.447	-13.0737
S5		[Torque left (Nm)]	7.72933	6.40333	5.33633	4.359	2.977	2.03267	1.09033	-0.0316667	-0.816333	-1.614	-2.50433	-3.201	-3.88633	-4.64967	-5.26733	-5.833	-6.51233	-7.037	-7.515	-8.156	-8.66667	-9.152	-9.79733	-10.3433	-10.9363	-11.5613	-12.0167	-12.5297	-12.9667	-13.3413	-13.7253	-13.9833	-14.29	-14.588	-14.7053	-14.7353	-14.635	-14.1763	-13.7767	-13.476	-13.0627	-12.9943	-13.0013	-13.0257	-13.346	-13.54	-13.8677
S6		[Torque left (Nm)]	4.85067	4.02933	2.873	2.10167	1.331	0.347	-0.305	-1.04333	-1.80333	-2.37833	-2.927	-3.51767	-4.012	-4.47267	-4.88767	-5.26133	-5.533	-5.94367	-6.303	-6.60267	-7.12233	-7.50367	-7.87	-8.366	-8.64567	-8.90333	-9.122	-9.03067	-8.93633	-8.817	-8.48433	-8.38467	-8.462	-8.52133	-8.911	-9.23533	-9.66533	-10.158	-10.4903	-11.087	-11.6017	-12.0933	-12.6937	-12.9807	-13.3013	-13.5037	-13.3413
S7		[Torque left (Nm)]	1.257	0.706333	-0.0986667	-0.568333	-1.056	-1.66067	-2.02167	-2.474	-2.955	-3.36033	-3.79733	-4.213	-4.62433	-5.02067	-5.445	-5.88467	-6.24067	-6.72633	-7.18067	-7.545	-8.081	-8.497	-8.91767	-9.486	-9.84267	-10.2387	-10.7103	-10.9937	-11.3263	-11.6017	-11.6893	-11.9093	-12.0687	-12.1377	-12.4107	-12.6467	-13.055	-13.6457	-13.9673	-14.2773	-14.2743	-14.0807	-14.076	-13.926	-13.8817	-13.82	-13.3677
S8		[Torque left (Nm)]	2.094	1.31033	0.216333	-0.507333	-1.28567	-2.251	-2.91233	-3.64833	-4.47	-5.13433	-5.79367	-6.518	-7.16567	-7.80767	-8.60933	-9.30667	-9.96333	-10.8193	-11.5467	-12.212	-13.0563	-13.6853	-14.2873	-15.0043	-15.519	-16.016	-16.5677	-16.8613	-17.1173	-17.2757	-17.2003	-17.1843	-17.102	-16.9763	-17.1	-17.2307	-17.4313	-17.6897	-17.7193	-17.7803	-17.754	-17.6587	-17.6573	-17.4657	-17.2173	-16.9127	-16.3223
S9		[Torque left (Nm)]	3.07667	2.43767	1.85967	0.974	0.398667	-0.207667	-1.01133	-1.55233	-2.19	-2.873	-3.44133	-3.99467	-4.635	-5.237	-5.777	-6.41833	-6.99333	-7.48767	-8.202	-8.78233	-9.308	-10.0837	-10.609	-11.157	-11.8083	-12.1187	-12.482	-12.7653	-12.6373	-12.4737	-12.1593	-11.597	-11.37	-11.4273	-11.617	-12.3123	-12.93	-13.5963	-14.314	-14.806	-15.5207	-16.0397	-16.357	-16.583	-16.2313	-15.7097	-15.262
S10		[Torque left (Nm)]	3.81967	3.122	2.101	1.451	0.713333	-0.142667	-0.78	-1.498	-2.28833	-2.967	-3.65133	-4.43633	-5.145	-5.782	-6.60533	-7.28333	-7.80033	-8.53567	-9.04067	-9.36067	-9.71967	-9.731	-9.40467	-9.12267	-8.927	-8.933	-9.529	-10.0443	-10.5787	-11.121	-11.412	-12.0177	-12.6	-13.0653	-13.48	-13.4237	-13.3527	-13.3723	-13.2937	-13.5297	-13.6837	-13.6113	-13.7787	-13.7783	-14.085	-14.5283	-14.6393
		average letf tourque	4.08153	3.2938	2.32493	1.55663	0.797133	-0.0404333	-0.716567	-1.40067	-2.1133	-2.74513	-3.34687	-3.98697	-4.58597	-5.1636	-5.80377	-6.39307	-6.93727	-7.58377	-8.16833	-8.71407	-9.3328	-9.87093	-10.3507	-10.8832	-11.3471	-11.7774	-12.2662	-12.6482	-12.9537	-13.2258	-13.3898	-13.5534	-13.7408	-13.9143	-14.1133	-14.2477	-14.3402	-14.3864	-14.2601	-14.2309	-14.1975	-14.1842	-14.3467	-14.3996	-14.4885	-14.5512	-14.4748
S1	100	[Torque right (Nm)]	1.988	2.14633	2.14467	2.21033	2.30567	2.35433	2.48233	2.58933	2.84033	3.09333	3.40833	3.86467	4.32433	4.86067	5.592	6.267	6.99067	7.94067	8.78933	9.65567	10.6773	11.5223	12.351	13.2777	14.054	14.7913	15.624	16.369	17.1787	18.202	19.0703	19.9657	21.0847	21.9727	22.993	24.2537	25.4947	26.905	28.8857	30.578	31.6653	32.0717	31.521	31.0837	30.91	30.7367	30.469
S2		[Torque right (Nm)]	0.839	1.313	1.80767	2.35367	2.877	3.58667	4.197	4.833	5.63467	6.26033	6.88867	7.70167	8.33	8.98333	9.71567	10.3307	10.964	11.701	12.361	13.0257	13.7613	14.4347	15.0677	15.7693	16.393	16.9567	17.6513	18.2717	18.9043	19.728	20.4237	21.207	22.2403	23.2387	24.408	25.906	27.4337	29.2223	31.4217	33.2047	34.53	35.4433	35.803	36.3613	36.8153	37.136	37.3797
S3		[Torque right (Nm)]	0.061	0.328	0.714333	0.957	1.271	1.55833	1.85667	2.24933	2.502	2.95067	3.33333	3.65067	4.20033	4.59267	5.03067	5.70433	6.15333	6.76667	7.54367	8.15867	8.95267	9.76733	10.5343	11.408	12.2997	13.2257	14.1363	15.0803	16.067	16.944	17.879	18.862	19.6873	20.632	21.5757	22.3503	23.2703	24.027	24.5813	25.2267	25.5293	25.8047	26.159	26.289	26.6333	26.7953	26.8757
S4		[Torque right (Nm)]	2.44267	2.56267	2.55033	2.69167	2.882	3.11967	3.44067	3.73333	4.22467	4.667	5.101	5.78333	6.289	6.85067	7.59567	8.10867	8.78367	9.51633	10.0867	10.7883	11.4903	12.1893	13.0217	13.8777	14.781	15.68	16.6857	17.7203	18.707	19.6813	20.6967	21.5577	22.3897	23.158	23.606	24.1293	24.5017	24.7203	25.0577	25.132	25.2387	25.3853	25.284	25.3903	25.431	25.3903	25.6133
S5		[Torque right (Nm)]	-0.112	0.00733333	0.173667	0.441333	0.699667	1.033	1.36967	1.87433	2.37533	2.89967	3.64367	4.224	4.83567	5.61567	6.206	6.81033	7.50367	8	8.585	9.14133	9.67333	10.2393	10.8557	11.4933	12.105	12.85	13.6317	14.352	15.278	16.0943	16.923	17.986	18.8577	19.6807	20.7887	21.8633	23.0493	24.5393	25.7523	26.691	27.617	28.106	28.5633	29.0507	29.121	29.2207	29.0993
S6		[Torque right (Nm)]	1.74233	1.94933	2.05867	2.24933	2.42267	2.599	2.88467	3.10267	3.525	3.88467	4.25133	4.86233	5.31667	5.858	6.63967	7.21067	7.93133	8.73233	9.341	10.0207	10.6707	11.283	11.9797	12.6387	13.4143	14.2283	15.1147	16.1463	17.1987	18.284	19.3757	20.1923	20.763	21.2577	21.456	21.803	22.051	22.2563	22.586	22.6033	22.6803	22.713	22.6253	22.7897	22.9027	23.0323	23.3567
S7		[Torque right (Nm)]	2.42767	2.69633	2.949	3.22967	3.47133	3.76467	4.066	4.30367	4.72867	5.03967	5.36867	5.87733	6.23233	6.68933	7.23867	7.663	8.23067	8.85567	9.42933	10.105	10.7957	11.5153	12.241	13.0123	13.91	14.779	15.7827	16.894	17.966	19.217	20.543	21.749	23.049	24.3543	25.3727	26.4083	27.1473	27.5843	28.2963	28.8263	29.509	30.1437	30.352	30.6417	30.7123	30.7567	31.0193
S8		[Torque right (Nm)]	2.168	2.59867	2.98233	3.42867	3.85733	4.42333	4.97867	5.501	6.26067	6.861	7.45667	8.31767	8.956	9.69267	10.615	11.3143	12.1333	13.0543	13.819	14.695	15.5847	16.441	17.35	18.3373	19.3593	20.3097	21.378	22.516	23.6287	24.8377	26.0803	27.0897	28.0887	28.977	29.467	29.9657	30.3127	30.5503	31.0793	31.3843	31.7593	32.125	32.2717	32.678	32.9953	33.2917	33.8
S9		[Torque right (Nm)]	0.422	0.639667	0.973	1.27133	1.63167	1.979	2.43033	2.87	3.299	3.90667	4.38567	4.929	5.72467	6.29967	6.95	7.796	8.42933	9.214	10.0637	10.8097	11.626	12.5337	13.456	14.4473	15.5437	16.652	17.7217	18.964	20.35	21.7737	23.293	24.7283	25.7483	26.3427	26.7327	26.8717	27.3747	27.8923	28.289	28.7707	28.914	29.2023	29.7167	30.2133	30.9377	31.5617	31.7917
S10		[Torque right (Nm)]	1.02967	1.15067	1.25933	1.45967	1.67233	2.02633	2.44767	2.929	3.73767	4.368	5.11467	6.22333	7.07233	8.07933	9.22867	10.1473	11.2613	12.4323	13.5353	14.8357	16.2657	17.8227	19.669	21.622	23.171	24.348	24.953	25.5653	26.1147	26.4873	26.8427	26.6257	26.5297	26.6953	26.8843	27.341	27.5317	27.4127	27.4307	27.229	27.134	27.181	26.8473	26.639	26.1787	25.8073	25.751
		average right tourque	1.30083	1.5392	1.7613	2.02927	2.30907	2.64443	3.01537	3.39857	3.9128	4.3931	4.8952	5.5434	6.12813	6.7522	7.4812	8.13523	8.83813	9.62133	10.3554	11.1236	11.9498	12.7749	13.6526	14.5884	15.5031	16.3821	17.2679	18.1879	19.1393	20.1249	21.1127	21.9963	22.8438	23.6309	24.3284	25.0892	25.8167	26.511	27.338	27.9646	28.4577	28.8176	28.9143	29.1137	29.2637	29.3729	29.5156
S1	exh	[Torque left (Nm)]	5.13933	4.34433	3.18033	2.48267	1.83333	0.936667	0.497333	-0.0956667	-0.774333	-1.18667	-1.833	-2.33933	-2.87033	-3.461	-3.91733	-4.48533	-4.94167	-5.356	-5.85	-6.069	-6.48433	-6.81133	-6.85333	-7.15133	-7.279	-7.147	-7.29933	-7.21867	-7.15667	-7.21333	-6.979	-6.951	-6.86267	-6.66333	-6.723	-6.60233	-6.553	-6.66233	-6.53167	-6.56833	-6.637	-6.51167	-6.622	-6.617	-6.55067	-6.65533	-6.52067
S2		[Torque left (Nm)]	8.662	7.54	6.01067	5.07667	4.315	3.319	2.88267	2.31733	1.76967	1.585	1.20467	1.04833	0.960333	0.784667	0.866	0.743	0.703667	0.824333	0.706333	0.768333	0.762667	0.710667	0.862333	0.760333	0.697667	0.767333	0.489	0.329333	0.131333	-0.433333	-0.683333	-1.19033	-1.91867	-2.40767	-3.22967	-4.01933	-4.69467	-5.56467	-6.18233	-6.82767	-7.484	-7.89567	-8.435	-8.80467	-9.12667	-9.58567	-9.77633
S3		[Torque left (Nm)]	9.64533	8.59	7.78133	6.65667	5.976	5.44167	4.633	4.27967	3.86967	3.383	3.213	2.871	2.632	2.44933	2.10333	2.022	1.727	1.493	1.40633	1.08467	0.935	0.664333	0.312333	0.174	-0.329667	-0.677333	-0.940333	-1.562	-1.87267	-2.27567	-2.83167	-3.06833	-3.58167	-4.07167	-4.30267	-4.74333	-5.048	-5.34567	-5.78067	-5.96967	-6.36033	-6.76767	-6.90167	-7.156	-7.31367	-7.41233	-7.451
S4		[Torque left (Nm)]	8.74367	8.17233	7.22467	6.674	6.24367	5.479	5.24267	4.90233	4.53133	4.53133	4.24367	4.286	4.35733	4.28367	4.57567	4.549	4.59533	4.91267	4.846	5.02267	5.19333	5.12667	5.28867	5.11433	4.928	4.82367	4.278	3.917	3.53067	2.86533	2.39567	1.71667	0.969667	0.394	-0.457667	-1.22067	-1.94533	-2.75267	-3.36267	-4.04233	-4.729	-5.25967	-5.882	-6.40033	-6.82067	-7.24	-7.42867
S5		[Torque left (Nm)]	11.0817	9.36233	8.125	7.05767	5.56867	4.62233	3.722	2.60567	2.00067	1.32567	0.687	0.349333	-0.113333	-0.344333	-0.550667	-0.797333	-0.758	-0.901333	-0.89	-0.684	-0.765667	-0.529667	-0.423667	-0.413333	-0.140667	-0.149	-0.019	0.135667	-0.001	0.0516667	-0.0216667	-0.208	-0.231	-0.506667	-0.826667	-1.082	-1.535	-1.89267	-2.258	-2.78033	-3.156	-3.71133	-4.3	-4.77	-5.41033	-5.875	-6.32067
S6		[Torque left (Nm)]	11.2747	10.451	9.11	8.31733	7.50767	6.33967	5.725	4.94767	4.17467	3.763	3.176	2.81733	2.44667	2.05933	1.88967	1.49833	1.261	1.02867	0.679667	0.528333	0.192333	-0.135	-0.243667	-0.622	-0.831667	-0.855667	-1.16333	-1.232	-1.28667	-1.51733	-1.49567	-1.74867	-1.90633	-1.96567	-2.29	-2.427	-2.59267	-2.83833	-2.88	-3.1	-3.24367	-3.16967	-3.24267	-3.18033	-3.095	-3.09033	-2.866
S7		[Torque left (Nm)]	5.696	5.08067	4.10533	3.52567	3.03533	2.24133	1.87733	1.39733	0.829	0.598	0.152667	-0.216333	-0.500333	-0.912	-1.073	-1.373	-1.60967	-1.69467	-2.00267	-2.113	-2.27733	-2.55067	-2.53767	-2.77933	-2.915	-2.88767	-3.16767	-3.211	-3.37	-3.64033	-3.725	-4.001	-4.32433	-4.50967	-4.866	-5.12167	-5.39267	-5.72	-5.92533	-6.18	-6.398	-6.59433	-6.95233	-7.13667	-7.29	-7.474	-7.48167
S8		[Torque left (Nm)]	6.60267	5.88167	4.85367	4.273	3.76367	3.044	2.75533	2.37867	2.01533	1.92567	1.62067	1.50067	1.40767	1.187	1.30333	1.16067	1.06667	1.11267	0.759333	0.597	0.332667	-0.0653333	-0.258333	-0.817333	-1.35833	-1.771	-2.60267	-3.33133	-4.059	-5.058	-5.88467	-6.92033	-8.059	-9.031	-10.2863	-11.498	-12.6743	-13.9037	-15.0043	-16.035	-16.981	-17.6583	-18.219	-18.5727	-18.7757	-18.9007	-18.722
S9		[Torque left (Nm)]	6.25233	5.25667	4.571	3.47033	2.905	2.39867	1.64133	1.39567	0.951667	0.474667	0.254333	-0.322667	-0.695667	-1.08267	-1.50767	-1.69733	-1.99467	-2.10867	-2.037	-2.047	-1.845	-1.59	-1.39733	-0.961667	-0.603	-0.21	0.440667	0.777333	1.33767	1.80867	2.05133	2.435	2.54033	2.51733	2.51367	2.153	1.93167	1.65767	1.188	1.00133	0.689333	0.357	0.206667	-0.157333	-0.346333	-0.486667	-0.782333
S10		[Torque left (Nm)]	9.09067	8.41333	7.37733	6.799	6.21967	5.52567	5.24033	4.80233	4.46767	4.29733	4.01467	3.94533	3.887	3.83267	3.95533	3.88233	3.87467	3.97267	3.931	4.02267	4.08633	4.044	4.17867	4.056	3.94333	3.909	3.68233	3.55433	3.34067	3.055	3.01667	2.708	2.28967	2.01967	1.42867	1.09467	0.789667	0.225	-0.100667	-0.600333	-1.01067	-1.18567	-1.688	-2.07567	-2.34667	-2.66367	-2.71867
		average left torque	8.21883	7.30923	6.23393	5.4333	4.7368	3.9348	3.4217	2.8931	2.38353	2.0697	1.67337	1.39397	1.15113	0.879667	0.764467	0.550233	0.392433	0.328333	0.1549	0.111067	0.013	-0.113633	-0.1072	-0.264033	-0.388833	-0.419767	-0.630233	-0.784133	-0.940567	-1.23573	-1.41573	-1.7228	-2.1084	-2.42247	-2.90397	-3.34667	-3.77143	-4.27973	-4.68377	-5.11023	-5.53103	-5.8397	-6.2036	-6.48707	-6.70757	-6.93837	-7.0068
S1	exh	[Torque right (Nm)]	5.70867	6.83333	8.16667	9.44	10.8937	12.663	14.385	16.1297	18.354	20.406	22.3443	25.003	27.378	29.7437	32.9707	35.5847	38.291	41.8343	44.684	47.737	51.3023	54.0153	57.048	60.3533	62.9207	65.7547	68.3493	70.5683	72.808	74.8067	76.8367	78.509	79.9447	81.3913	82.3347	83.4087	84.2997	84.8247	85.5343	85.8793	86.032	86.268	85.963	85.7177	85.3127	84.5313	83.935
S2		[Torque right (Nm)]	4.602	4.984	5.36167	5.97733	6.78167	7.868	9.12467	10.385	12.1397	13.819	15.309	17.5327	19.406	21.3073	24.05	26.175	28.5017	31.5937	34.209	37.0813	40.501	43.4657	46.6953	50.146	53.1083	56.234	59.3613	62.1553	64.9167	67.2897	69.449	71.2763	72.733	74.0437	74.8263	75.474	76.087	76.3427	76.7537	77.0073	77.07	77.343	77.34	77.39	77.4737	77.291	77.3373
S3		[Torque right (Nm)]	5.15	5.761	6.59567	7.369	8.06767	8.841	9.59633	10.4543	11.2257	12.2377	13.257	14.1293	15.5047	16.709	17.8793	19.7407	21.1927	22.8047	25.0207	26.7787	28.7267	31.0773	33.0633	35.2913	37.705	39.8283	42.0857	44.4017	46.6153	48.8523	51.0833	53.265	55.1263	57.0453	58.9197	60.505	62.209	63.6103	64.7453	66.031	66.8593	67.6203	68.472	68.9087	69.402	69.6257	69.695
S4		[Torque right (Nm)]	14.0903	14.6107	14.9807	15.4213	15.978	16.4647	17.1573	17.7393	18.5693	19.48	20.165	21.3513	22.4833	23.5977	25.5143	27.1303	28.9523	31.7123	33.9857	36.5537	39.8463	42.4323	45.2353	48.254	50.6887	53.281	55.8203	58.0617	60.473	62.535	64.4243	66.0507	67.4827	68.869	69.777	70.7097	71.4157	71.8207	72.274	72.4047	72.267	72.224	71.7653	71.316	70.7373	69.8837	69.1867
S5		[Torque right (Nm)]	1.366	1.851	2.25367	2.891	3.49967	4.12967	4.86033	5.702	6.63433	7.52367	8.75167	9.872	10.9087	12.466	13.8027	15.1763	17.2243	18.793	20.5823	22.9953	24.8993	27.0183	29.511	31.5883	33.9283	36.645	39.1523	41.6963	44.2277	46.5593	48.9487	51.1527	53.367	55.487	57.4707	59.3147	60.8817	62.4467	63.9017	65.0407	66.2667	67.1387	67.806	68.5307	68.837	69.0827	69.1033
S6		[Torque right (Nm)]	12.3337	13.029	13.6923	14.4397	15.256	16.189	17.2283	18.2313	19.5643	20.848	21.9603	23.5537	24.8393	26.1083	28.026	29.578	31.3847	33.9617	36.197	38.7567	41.932	44.58	47.5093	50.637	53.1637	55.849	58.3643	60.4363	62.4813	64.0403	65.5087	66.525	67.3667	68.174	68.4937	68.8633	69.1307	69.062	69.2353	69.0947	68.9103	68.995	68.7367	68.6253	68.435	68.0043	67.811
S7		[Torque right (Nm)]	9.66833	9.98167	10.1123	10.4357	10.838	11.2373	11.885	12.453	13.3113	14.2357	15.0203	16.1957	17.242	18.1563	19.6913	20.8383	22.037	23.8113	25.1477	26.7177	28.7457	30.4397	32.531	34.8573	36.876	39.1297	41.3663	43.418	45.454	47.2667	49.016	50.366	51.4973	52.6643	53.35	53.973	54.3803	54.3623	54.5337	54.3747	54.121	53.889	53.3077	52.9943	52.5033	51.91	51.5623
S8		[Torque right (Nm)]	8.147	8.55367	8.96867	9.55633	10.3233	11.197	12.277	13.4427	15.1583	16.994	18.8643	21.7517	24.429	27.1547	31.0913	34.2037	37.506	41.7683	45.1133	48.5987	52.63	55.6607	58.7663	61.749	63.9707	66.143	68.0217	69.481	70.8907	71.877	72.7747	73.309	73.696	74.0687	73.9453	73.9223	73.6713	73.1597	72.7823	72.113	71.404	70.767	69.8633	69.094	68.1383	67.1447	66.4113
S9		[Torque right (Nm)]	11.6273	12.4107	13.434	14.5903	15.65	16.7873	18.1797	19.5037	20.8053	22.528	24.1743	25.7673	28.0513	30.0693	32.12	34.9043	37.0617	39.2547	41.9907	44.1453	46.2677	48.6973	50.577	52.5913	54.8533	56.708	58.751	60.6133	62.2487	64.016	65.564	67.1067	68.4637	69.7517	70.997	72.0013	73.153	74.2053	74.957	75.9713	76.7147	77.3827	78.2403	78.715	79.3203	79.862	79.9493
S10		[Torque right (Nm)]	3.973	5.04067	6.23533	7.36967	8.605	10.1357	11.622	13.1353	15.0913	16.875	18.594	20.9503	23.117	25.2293	28.1143	30.4413	32.7847	36.0193	38.518	41.1077	44.1777	46.465	48.8877	51.3163	53.2527	55.3457	57.2503	58.9313	60.6327	62.1903	63.8337	65.1177	66.3237	67.6297	68.565	69.7067	70.6303	71.2543	72.2163	72.6683	73.1523	73.6667	73.706	73.9123	73.8953	73.669	73.56
		average right torque	7.66663	8.30557	8.9801	9.74903	10.5893	11.5513	12.6316	13.7176	15.0854	16.4947	17.844	19.6107	21.3359	23.0542	25.326	27.3773	29.4936	32.1553	34.5448	37.0472	39.9029	42.3852	44.9824	47.6784	50.0467	52.4918	54.8523	56.9763	59.0748	60.9433	62.7439	64.2678	65.6001	66.9125	67.8679	68.7879	69.5859	70.1089	70.6934	71.0585	71.2797	71.5294	71.52	71.5204	71.4055	71.1004	70.8551
[truncated: 138 more columns]

## Sheet: AI RAW data 
										with signs
	Temp					Torque					Temp					Torque
	100w										100w
Subjects	L	R	AI%			L	R	AI%		Subjects	L	R	AI%			L	R	AI%
S1	32.86	33.76	2.66588			30.9603	32.0717	3.46516		S1	32.86	33.76	2.66588			30.9603	32.0717	3.46516
S2	32.95	32.45	1.51745			35.389	37.3797	5.32553		S2	32.95	32.45	-1.52			35.389	37.3797	5.32553
S3	33.433	32.94	1.47459			30.4283	27.2833	10.3358		S3	33.433	32.94	-1.47			30.4283	27.2833	-10.34
S4	33.404	32.969	1.30224			26.64	27.097	1.68653		S4	33.404	32.969	-1.3			26.64	27.097	1.68653
S5	31.388	31.317	0.226201			32.4647	29.2207	9.9924		S5	31.388	31.317	-0.23			32.4647	29.2207	-9.99
S6	32.38	32.15	0.710315			25.8777	24.6557	4.72222		S6	32.38	32.15	-0.71			25.8777	24.6557	-4.72
S7	33.492	33.507	0.0447668			32.785	31.0193	5.38559		S7	33.492	33.507	0.0447668			32.785	31.0193	-5.39
S8	32.034	31.499	1.6701			30.0097	34.094	11.9796		S8	32.034	31.499	-1.67			30.0097	34.094	11.9796
S9	33.42	33.31	0.329144			30.939	32.405	4.52399		S9	33.42	33.31	-0.33			30.939	32.405	4.52399
S10	32.587	33.003	1.26049			33.506	27.5317	17.8306		S10	32.587	33.003	1.26049			33.506	27.5317	-17.83
													-0.325886					-2.12892
													1.38451					9.0543
	Temp					Torque					Temp					Torque
	exhaustion										exhaustion
Subjects	L	R	AI%			L	R	AI%		Subjects	L	R	AI%			L	R	AI%
S1	31.27	31.28	0.0319693			80.0537	86.268	7.20352		S1	31.27	31.28	0.0319693			80.0537	86.268	7.20352
S2	31.23	31.51	0.888607			69.768	77.4737	9.94618		S2	31.23	31.51	0.888607			69.768	77.4737	9.94618
S3	31.049	30.627	1.35914			68.4873	69.8637	1.97003		S3	31.049	30.627	-1.36			68.4873	69.8637	1.97003
S4	31.079	30.708	1.19373			60.4947	72.4047	16.4492		S4	31.079	30.708	-1.19			60.4947	72.4047	16.4492
S5	28.859	29.621	2.5725			61.4837	69.1033	11.0265		S5	28.859	29.621	2.5725			61.4837	69.1033	11.0265
S6	31.68	31.45	0.72601			67.6067	69.2353	2.35236		S6	31.68	31.45	-0.73			67.6067	69.2353	2.35236
S7	33.433	33.277	0.466605			55.8917	54.5337	2.4297		S7	33.433	33.277	-0.47			55.8917	54.5337	-2.43
S8	31.655	30.794	2.71995			65.156	74.0687	12.033		S8	31.655	30.794	-2.72			65.156	74.0687	12.033
S9	32.49	33.13	1.93178			79.8973	80.085	0.234334		S9	32.49	33.13	1.93178			79.8973	80.085	0.234334
S10	31.116	29.959	3.71834			75.9013	73.9123	2.62051		S10	31.116	29.959	-3.72			75.9013	73.9123	-2.62
													-0.476514					5.61651
													1.94724					6.62115
